# Supplementary material
Source: PubMed Central journal article supplement (PMC3371761)
Supplement: NIHMS332755-supplement-1.pdf [file NIHMS332755-supplement-1.pdf]

| Mean ± SEM                         |      | WT            | IL4/IL13 <sup>-/-</sup> | STAT6 <sup>-/-</sup> | IL4Rα <sup>L/L</sup> | IL4Rα <sup>L/L</sup><br>LysM <sup>Cre</sup> |
|------------------------------------|------|---------------|-------------------------|----------------------|----------------------|---------------------------------------------|
| Food [g hr <sup>-1</sup> ]         | 30°C | 0.14 ± 0.03   | 0.19 ± 0.02             | 0.16 ± 0.01          | 0.17 ± 0.02          | 0.13 ± 0.03                                 |
|                                    | 22°C | 0.12 ± 0.01   | 0.12 ± 0.01             | 0.14 ± 0.03          | 0.13 ± 0.01          | 0.14 ± 0.01                                 |
|                                    | 4°C  | 0.39 ± 0.02   | 0.37 ± 0.10             | 0.31 ± 0.03          | 0.24 ± 0.04          | 0.21 ± 0.01                                 |
| TG [mg dl <sup>-1</sup> ]          | 30°C | 152.1 ± 11.91 | 153.5 ± 18.22           | 174.8 ± 10.23        | 152.1 ± 23.83        | 102.5 ± 22.78                               |
|                                    | 22°C | 162.1 ± 14.38 | 164.6 ± 19.83           | 173.4 ± 23.63        | 148.9 ± 17.62        | 126.3 ± 19.05                               |
|                                    | 4°C  | 127.3 ± 10.53 | 103.9 ± 15.45           | 123.7 ± 10.62        | 126.7 ± 38.73        | 105.3 ± 45.15                               |
| Cholesterol [mg dl <sup>-1</sup> ] | 30°C | 91.74 ± 3.91  | 102.4 ± 5.37            | 105.9 ± 2.39         | 84.81 ± 16.76        | 91.29 ± 4.13                                |
|                                    | 22°C | 115.9 ± 8.47  | 113.3 ± 8.00            | 95.65 ± 11.35        | 98.44 ± 5.05         | 89.4 ± 5.68                                 |
|                                    | 4°C  | 115.5 ± 10.61 | 118.6 ± 6.19            | 113.3 ± 7.59         | 92.39 ± 4.77         | 84.12 ± 3.11                                |
| Body Weight [g]                    |      | 21.44 ± 0.69  | 19.20 ± 0.42            | 20.26 ± 0.19         | 22.96 ± 0.40         | 21.77 ± 0.51                                |
| Weight Loss (%)                    |      | 6.50 ± 2.19   | 3.41 ± 1.64 *           | 2.83 ± 1.79 **       | 7.38 ± 2.14          | 3.55 ± 1.21 **                              |

| Mean ± SEM                         |      | Liposome       | Clodronate    | C57BL/6J       | C57BL/6J<br>STAT6 <sup>-/-</sup> |
|------------------------------------|------|----------------|---------------|----------------|----------------------------------|
| Food [g hr <sup>-1</sup> ]         | 22°C | 0.14 ± 0.03    | 0.14 ± 0.01   | 0.096 ± 0.01   | 0.13 ± 0.01                      |
|                                    | 4°C  | 0.23 ± 0.04    | 0.26 ± 0.02   | 0.21 ± 0.02    | 0.22 ± 0.02                      |
| TG [mg dl <sup>-1</sup> ]          | 22°C | 133.3 ± 6.66   | 131.1 ± 17.66 | 166.1 ± 14.89  | 170.5 ± 12.79                    |
|                                    | 4°C  | 101.8 ± 2.53   | 123 ± 6.91    | 162.1 ± 11.01  | 157.9 ± 11.91                    |
| Cholesterol [mg dl <sup>-1</sup> ] | 22°C | 104.3 ± 4.17   | 131.2 ± 5.05  | 94.87 ± 4.88   | 92.75 ± 2.99                     |
|                                    | 4°C  | 111.3 ± 4.86   | 149.3 ± 7.41  | 86.21 ± 20.95  | 94.3 ± 5.16                      |
| Weight Loss (%)                    |      | 7.84 ± 1.26 ** | 3.37 ± 2.61   | 7.30 ± 1.31 ** | 3.88 ± 1.16                      |

**Supplementary Table 1. Metabolic characteristics of mice exposed to a cold challenge.**

\*P < 0.05, \*\*P < 0.01.

| BAT [ng<br>µg protein <sup>-1</sup> ] |      | IL4Rα <sup>L/L</sup> | IL4Rα <sup>L/L</sup><br>LysM <sup>Cre</sup> | Empty<br>Liposome | Clodronate<br>Liposome | C57BL/6J        | C57BL/6J<br>STAT6 <sup>-/-</sup> |
|---------------------------------------|------|----------------------|---------------------------------------------|-------------------|------------------------|-----------------|----------------------------------|
| Noradrenaline                         | 22°C | 9.88 ±<br>3.31       | 7.35 ±<br>3.35                              | 7.58 ±<br>1.63    | 8.51 ±<br>2.39         | 7.25 ±<br>1.68  | 7.97 ±<br>2.19                   |
|                                       | 4°C  | 6.22 ±<br>1.91       | 1.64 ±<br>0.32 *                            | 8.49 ±<br>1.86    | 3.16 ±<br>0.83 *       | 9.06 ±<br>1.25  | 1.29 ±<br>0.49 **                |
| Adrenaline                            | 22°C | 7.47 ±<br>1.73       | 7.09 ±<br>1.49                              | 4.08 ±<br>1.56    | 5.56 ±<br>1.44         | 8.85 ±<br>2.94  | 3.75 ±<br>1.42                   |
|                                       | 4°C  | 8.26 ±<br>0.65       | 4.08 ±<br>1.29 *                            | 8.30 ±<br>1.89    | 1.34 ±<br>0.14 *       | 9.64 ±<br>2.76  | 1.34 ±<br>0.20 *                 |
| Dopamine                              | 22°C | 7.13 ±<br>1.60       | 7.93 ±<br>1.65                              | 8.28 ±<br>1.63    | 7.40 ±<br>1.03         | 8.45 ±<br>1.31  | 7.32 ±<br>1.33                   |
|                                       | 4°C  | 6.51 ±<br>1.06       | 2.60 ±<br>0.94 *                            | 6.26 ±<br>0.54    | 2.75 ±<br>0.52 **      | 8.77 ±<br>1.41  | 1.06 ±<br>0.32 **                |
| WAT [pg<br>µg protein <sup>-1</sup> ] |      | IL4Rα <sup>L/L</sup> | IL4Rα <sup>L/L</sup><br>LysM <sup>Cre</sup> | Empty<br>Liposome | Clodronate<br>Liposome | C57BL/6J        | C57BL/6J<br>STAT6 <sup>-/-</sup> |
| Noradrenaline                         | 22°C | 28.53 ±<br>6.82      | 20.87 ±<br>5.34                             | 40.81 ±<br>6.80   | 43.04 ±<br>10.33       | 40.65 ±<br>8.41 | 42.03 ±<br>12.29                 |
|                                       | 4°C  | 18.17 ±<br>2.57      | 6.25 ±<br>1.04 **                           | 42.32 ±<br>7.77   | 20.00 ±<br>5.25 *      | 34.52 ±<br>5.27 | 19.33 ±<br>2.34 *                |
| Adrenaline                            | 22°C | 38.77 ±<br>9.09      | 37.85 ±<br>7.83                             | 26.73 ±<br>2.91   | 24.29 ±<br>3.98        | 25.79 ±<br>2.97 | 27.76 ±<br>3.27                  |
|                                       | 4°C  | 32.98 ±<br>3.47      | 22.58 ±<br>2.09 *                           | 25.71 ±<br>2.47   | 13.87 ±<br>2.41 *      | 28.64 ±<br>2.94 | 9.94 ±<br>1.61 **                |
| Dopamine                              | 22°C | 15.86 ±<br>6.80      | 20.12 ±<br>6.26                             | 28.62 ±<br>8.72   | 13.8 ±<br>5.30         | 22.72 ±<br>6.38 | 9.64 ±<br>3.11                   |
|                                       | 4°C  | 18.33 ±<br>3.22      | 3.72 ±<br>2.11**                            | 26.92 ±<br>6.65   | 3.63 ±<br>0.34 *       | 23.62 ±<br>7.31 | 3.20 ±<br>0.99*                  |

Supplementary Table 2. Catecholamine content of BAT and WAT in various strains of mice at 22 °C and 4 °C.

\*P < 0.05, \*\*P < 0.01.

| Serum [ng ml <sup>-1</sup> ]                 |      | WT            | IL4/IL13 <sup>-/-</sup> | STAT6 <sup>-/-</sup> | IL4R <sup>L/L</sup> | IL4R <sup>L/L</sup><br>LysM <sup>Cre</sup> |
|----------------------------------------------|------|---------------|-------------------------|----------------------|---------------------|--------------------------------------------|
| Noradrenaline                                | 22°C | 14.38 ± 0.89  | 13.07 ± 0.74            | 14.81 ± 2.37         | 15.92 ± 1.73        | 16.21 ± 3.51                               |
|                                              | 4°C  | 13.00 ± 0.46  | 12.34 ± 0.81            | 12.85 ± 2.50         | 14.51 ± 1.78        | 16.38 ± 4.16                               |
| Adrenaline                                   | 22°C | 22.23 ± 7.95  | 19.72 ± 4.7             | 27.99 ± 9.91         | 27.4 ± 3.81         | 24.69 ± 3                                  |
|                                              | 4°C  | 22.39 ± 6.39  | 24.9 ± 4.53             | 29.15 ± 7.24         | 29.96 ± 3.96        | 26.99 ± 3.01                               |
| Dopamine                                     | 22°C | 19.43 ± 1.28  | 17.20 ± 4.51            | 16.79 ± 3.11         | 13.71 ± 2.60        | 17.14 ± 3.42                               |
|                                              | 4°C  | 14.98 ± 3.56  | 16.92 ± 1.42            | 13.21 ± 0.54         | 16.23 ± 6.91        | 20.43 ± 2.64                               |
| Liver [pg µg protein <sup>-1</sup> ]         |      | WT            | IL4/IL13 <sup>-/-</sup> | STAT6 <sup>-/-</sup> | IL4R <sup>L/L</sup> | IL4R <sup>L/L</sup><br>LysM <sup>Cre</sup> |
| Noradrenaline                                | 22°C | 13.66 ± 4.30  | 13.49 ± 6.08            | 13.06 ± 4.92         | 12.8 ± 4.65         | 12.53 ± 4.89                               |
|                                              | 4°C  | 18.7 ± 8.49   | 19.3 ± 10.91            | 18.57 ± 9.52         | 18.13 ± 9.49        | 17.51 ± 8.67                               |
| Adrenaline                                   | 22°C | 21.69 ± 8.28  | 19.86 ± 6.76            | 20.19 ± 7.22         | 13.73 ± 5.59        | 32.73 ± 18.51                              |
|                                              | 4°C  | 33.01 ± 17.85 | 17.33 ± 5.97            | 28.45 ± 12.43        | 27.71 ± 5.77        | 28.98 ± 13.46                              |
| Dopamine                                     | 22°C | 18.24 ± 8.40  | 23.6 ± 15.32            | 24.2 ± 15.18         | 18.31 ± 5.72        | 18.7 ± 5.80                                |
|                                              | 4°C  | 18.22 ± 6.93  | 22.18 ± 8.92            | 19.33 ± 4.45         | 14.51 ± 1.72        | 14.61 ± 2.68                               |
| Quadriceps [pg µg protein <sup>-1</sup> ]    |      | WT            | IL4/IL13 <sup>-/-</sup> | STAT6 <sup>-/-</sup> | IL4R <sup>L/L</sup> | IL4R <sup>L/L</sup><br>LysM <sup>Cre</sup> |
| Noradrenaline                                | 22°C | 0.37 ± 0.33   | 0.66 ± 0.65             | 0.79 ± 0.47          | 2.87 ± 0.80         | 1.80 ± 0.94                                |
|                                              | 4°C  | 0.43 ± 0.08   | 0.51 ± 0.29             | 0.64 ± 0.41          | 1.27 ± 0.82         | 1.13 ± 0.61                                |
| Adrenaline                                   | 22°C | 2.21 ± 0.91   | 2.65 ± 0.80             | 2.73 ± 1.06          | 0.74 ± 0.55         | 0.88 ± 0.89                                |
|                                              | 4°C  | 0.92 ± 0.25   | 0.64 ± 0.16             | 1.03 ± 0.55          | 0.24 ± 0.11         | 0.62 ± 0.41                                |
| Dopamine                                     | 22°C | 0.37 ± 0.33   | 0.66 ± 0.65             | 0.79 ± 0.47          | 0.75 ± 0.55         | 0.89 ± 0.89                                |
|                                              | 4°C  | 0.44 ± 0.07   | 0.50 ± 0.28             | 0.21 ± 0.11          | 0.24 ± 0.11         | 0.62 ± 0.42                                |
| Adrenal Gland [pg µg protein <sup>-1</sup> ] |      | WT            | IL4/IL13 <sup>-/-</sup> | STAT6 <sup>-/-</sup> | IL4R <sup>L/L</sup> | IL4R <sup>L/L</sup><br>LysM <sup>Cre</sup> |
| Noradrenaline                                | 22°C | 50.84 ± 27.14 | 44.39 ± 3.95            | 33.82 ± 12.26        | 50.20 ± 25.95       | 35.87 ± 11.67                              |
|                                              | 4°C  | 45.17 ± 8.32  | 39.52 ± 4.89            | 37.44 ± 4.76         | 43.27 ± 7.63        | 39.76 ± 5.00                               |
| Adrenaline                                   | 22°C | 20.82 ± 7.26  | 22.14 ± 4.66            | 19.9 ± 3.77          | 26.62 ± 11.43       | 22.95 ± 5.51                               |
|                                              | 4°C  | 22.12 ± 3.51  | 17.23 ± 2.53            | 19.25 ± 2.67         | 18.04 ± 2.75        | 18.12 ± 2.45                               |
| Dopamine                                     | 22°C | 20.4 ± 5.85   | 18.45 ± 4.81            | 21.56 ± 1.34         | 23.95 ± 8.44        | 26.14 ± 3.83                               |
|                                              | 4°C  | 17.16 ± 1.34  | 13.99 ± 3.06            | 19.06 ± 2.08         | 25.14 ± 2.65        | 19.19 ± 3.81                               |

Supplementary Table 3. Catecholamine content of tissues in various strains of mice at 22 °C and 4 °C.

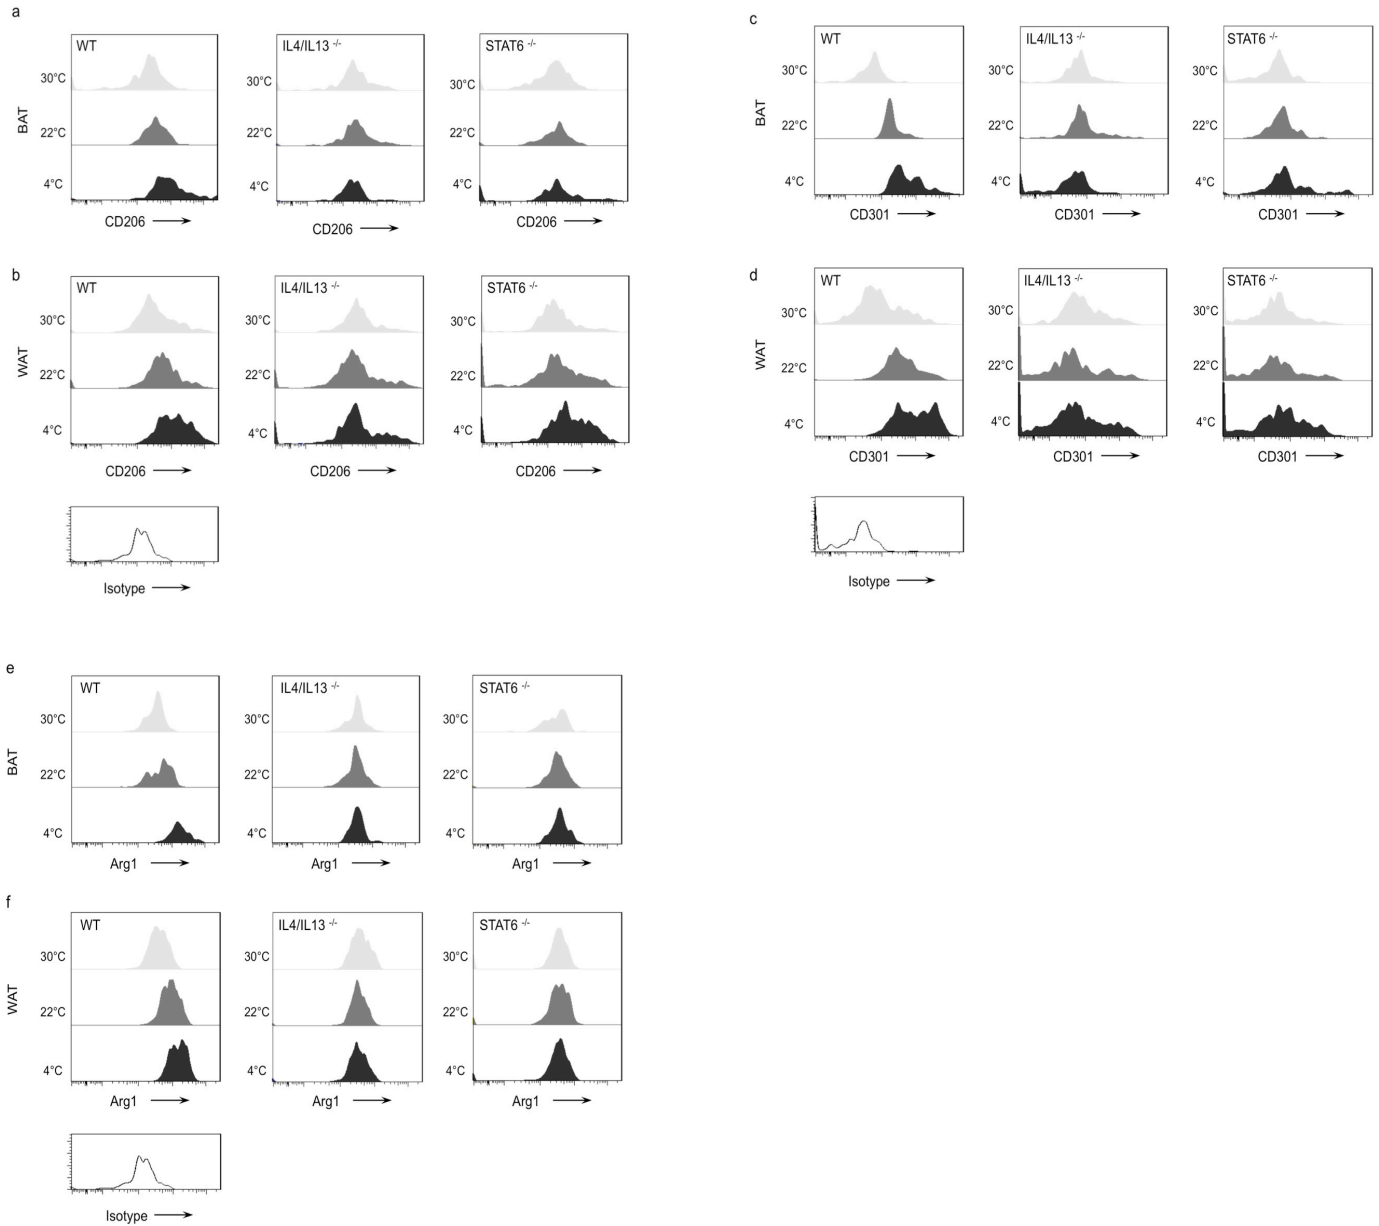

**Supplementary Figure 1. Expression of alternative activation markers in adipose tissue macrophages.** **a, b,** Representative FACS plots of CD206 in BAT (a) and WAT (b) macrophages of WT, IL4/IL13<sup>-/-</sup>, and STAT6<sup>-/-</sup> mice housed at 30 °C, 22 °C or 4 °C. **c, d,** Representative FACS plots of CD301 in BAT (c) and WAT (d) macrophages of WT, IL4/IL13<sup>-/-</sup>, and STAT6<sup>-/-</sup> mice housed at 30 °C, 22 °C or 4 °C. **e, f,** Representative FACS plots of Arg1 in BAT (e) and WAT (f) macrophages of WT, IL4/IL13<sup>-/-</sup>, and STAT6<sup>-/-</sup> mice housed at 30 °C, 22 °C or 4 °C.

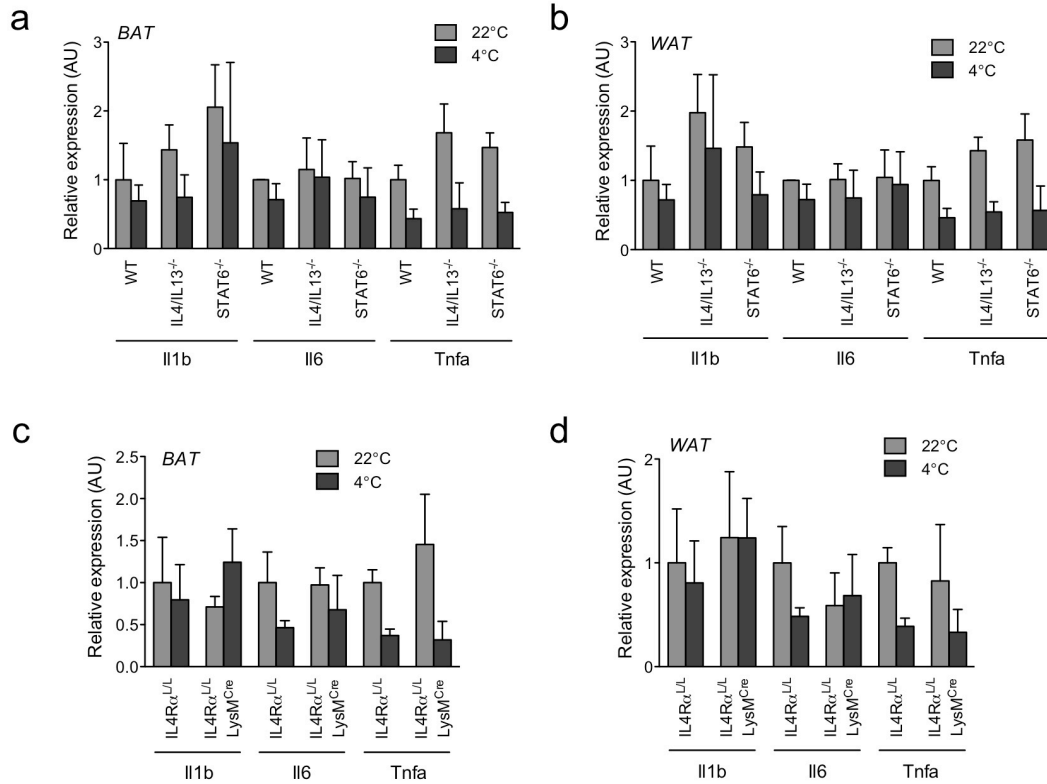

**Supplementary Figure 2. Expression of inflammatory genes representative of classical macrophage activation in adipose tissue.** **a, b** BAT (a) and WAT (b) from WT, IL4/IL13<sup>-/-</sup>, and STAT6<sup>-/-</sup> mice housed at 30 °C, 22 °C or 4 °C were analyzed by real-time PCR for expression of *Il1*, *Il6*, and *Tnfa* (n=4 per temperature). **c, d** BAT (c) and WAT (d) from IL4Rα<sup>L/L</sup> and IL4Rα<sup>L/L</sup>LysM<sup>Cre</sup> mice housed at 30 °C, 22 °C, and 4 °C were analyzed by real-time PCR for expression of *Il1*, *Il6*, and *Tnfa* (n=4 per temperature).

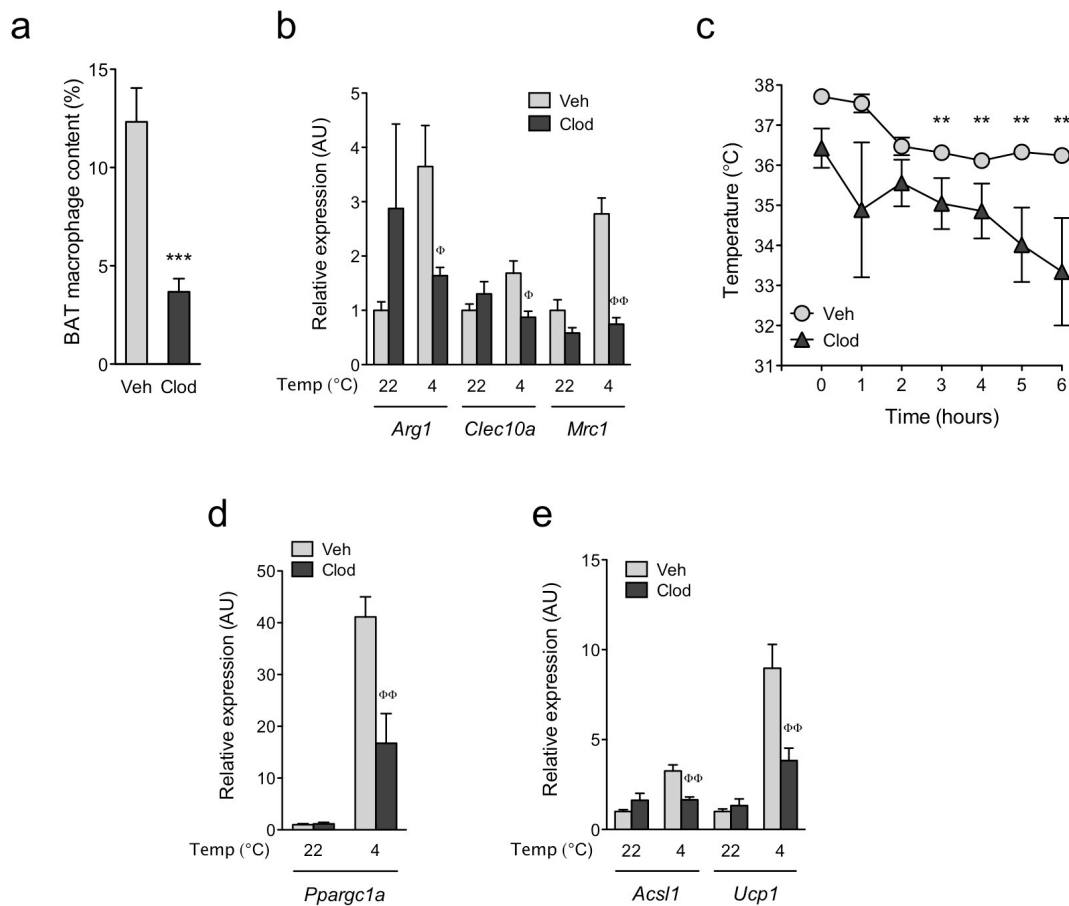

**Supplementary Figure 3. Macrophages are required for adaptation to cold temperatures.** **a**, BAT macrophage content in mice treated with empty (Veh) or clodronate-containing (Clod) liposomes (n=13-15 per treatment). **b**, Real-time PCR analysis of alternative activation markers in BAT of mice treated with Veh or Clod and then housed at 22 °C and 4 °C (n=5 per treatment and temperature). **c**, Core body temperature of mice treated with Veh or Clod after exposure to 4 °C (n=7-8 per treatment). **d, e**, Real-time PCR analysis of *Pparg1a* (d), *Ucp1*, and *Acs11*(e) in BAT of mice treated with Veh or Clod and housed at 22 °C or 4 °C (n=4-5 per treatment and temperature). \*\*P < 0.01, \*\*\*P < 0.001 compared to Veh. ΦP < 0.05, ΦΦP < 0.01 compared to Veh at 4 °C.

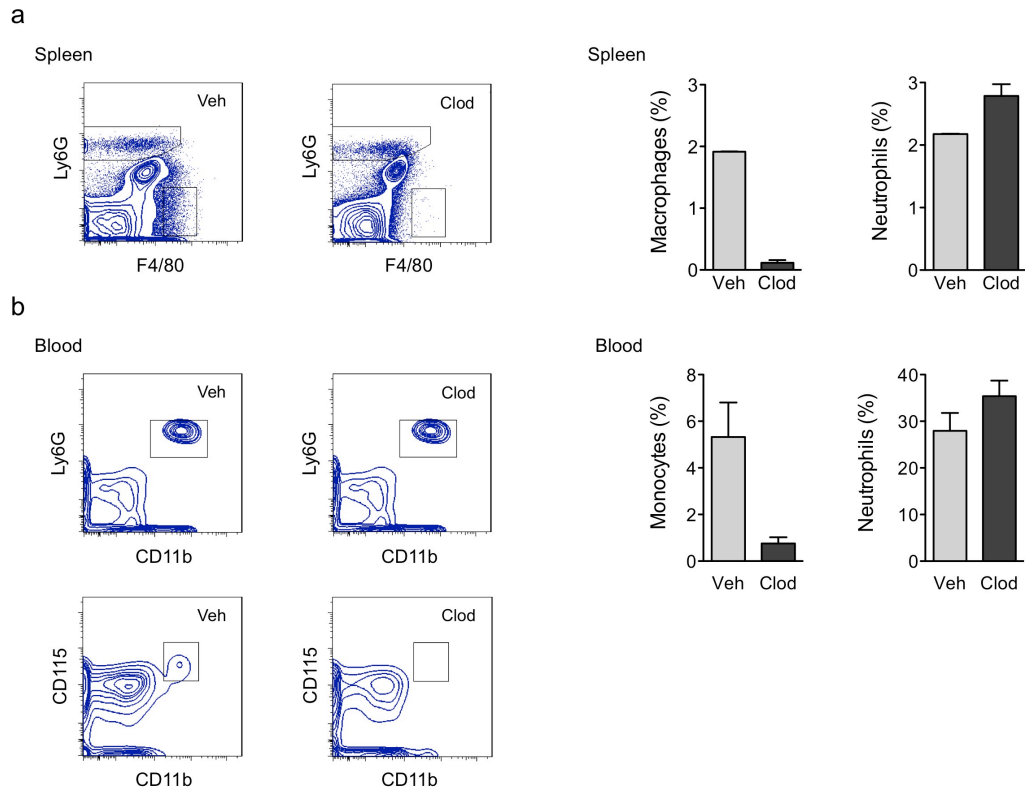

**Supplementary Figure 4. Depletion of macrophages and monocytes by clodronate-containing liposomes.** **a**, Representative FACS plots (*left*) and frequencies (*right*) of Ly6G<sup>+</sup> neutrophils and F4/80<sup>+</sup> macrophages in total splenocytes from mice treated with empty (Veh) or clodronate-containing (Clod) liposomes (n=2-3 per treatment). **b**, Representative FACS plots (*left*) and frequencies (*right*) of Ly6G<sup>+</sup> neutrophils and CD115<sup>+</sup> monocytes in total white blood cells from mice treated with Veh or Clod (n=2-3 per treatment).

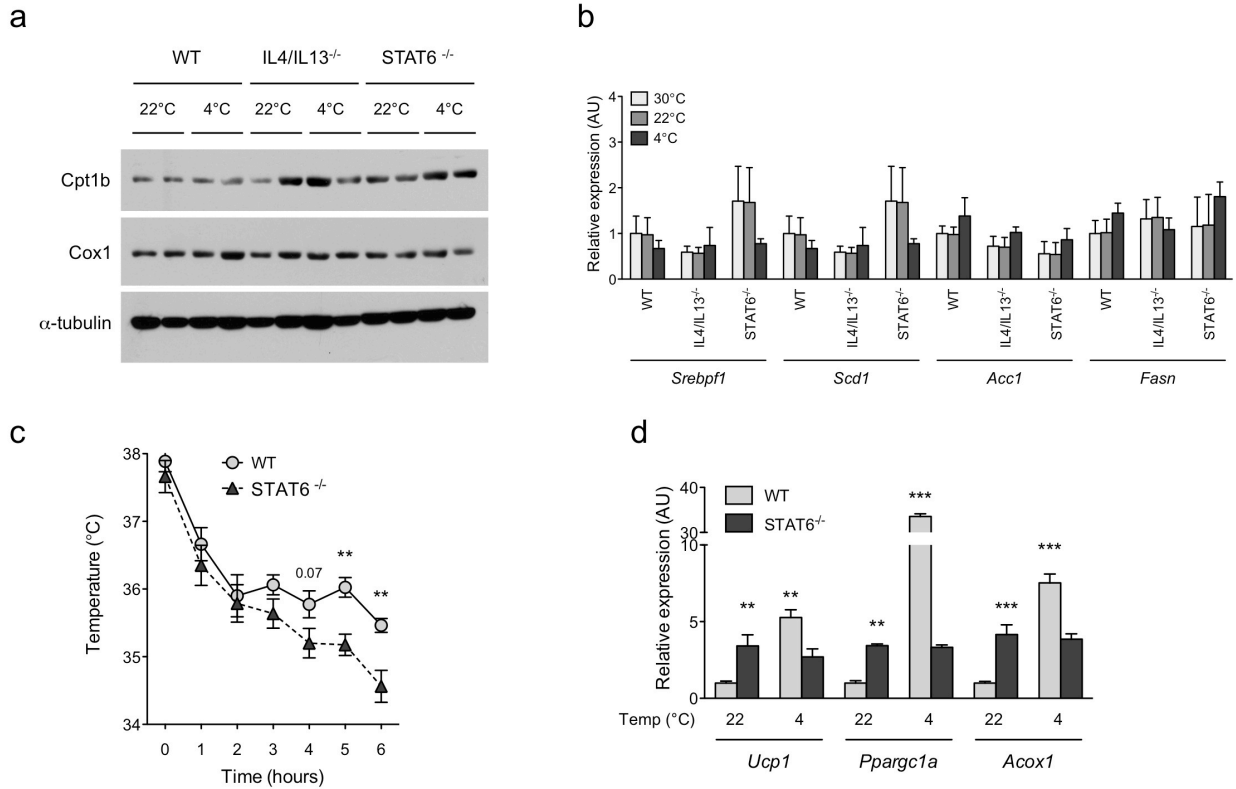

**Supplementary Figure 5. a**, Immunoblot analysis of muscle cpt1 (Cpt1b) and cytochrome c oxidase (Cox1) in soleus muscles of WT, IL4/IL13<sup>-/-</sup>, and STAT6<sup>-/-</sup> mice housed at 22 °C or 4 °C. **b**, Expression of lipogenic genes in liver of WT, IL4/IL13<sup>-/-</sup>, and STAT6<sup>-/-</sup> mice housed at 30 °C, 22 °C or 4 °C (n=3 per genotype and temperature). **c, d**, Core body temperature of C57BL/6J WT and STAT6<sup>-/-</sup> mice housed at 4 °C for 6 hours (n=5 per genotype and temperature). **d**, Real-time PCR of *Acox1*, *Pparg1a*, and *Ucp1* mRNA levels in BAT of C57BL/6J WT and STAT6<sup>-/-</sup> mice housed at 22 °C and 4 °C (n=5 per genotype and temperature). \*\*P < 0.01, \*\*\*P < 0.001 comparison between WT and STAT6<sup>-/-</sup> at the same temperature.



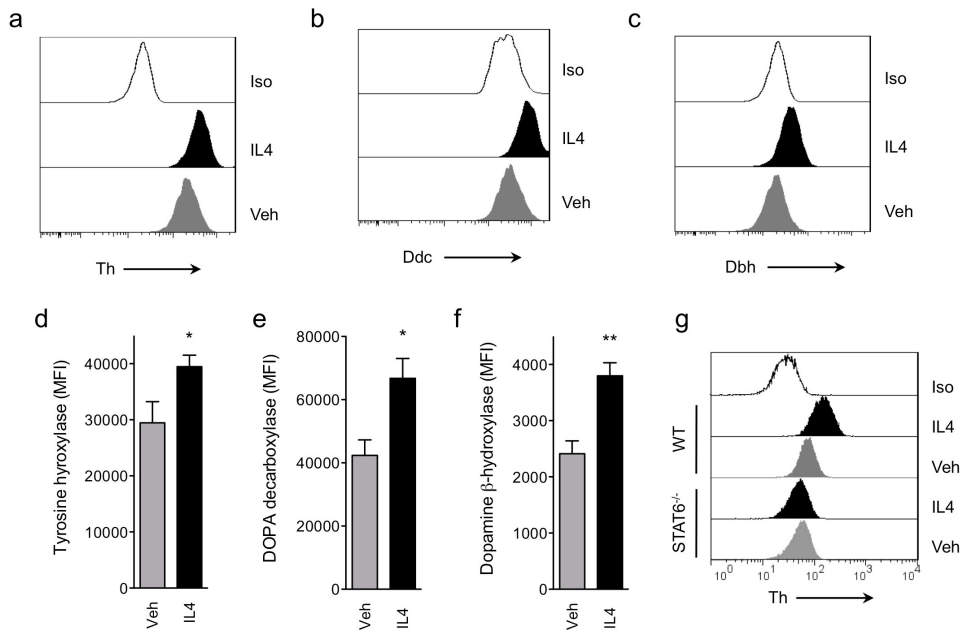

**Supplementary Figure 6. Alternative activation induces expression of catecholamine synthesizing enzymes in macrophages.** **a-c**, Representative FACS plots demonstrating intracellular staining for tyrosine hydroxylase (Th), dopa decarboxylase (Ddc), and dopamine  $\beta$ -hydroxylase (Dbh) in wild type peritoneal macrophages treated with vehicle (Veh) or IL4 (10 ngml<sup>-1</sup>). Background staining was quantified using an appropriate isotype (Iso) control antibody. **d-f**, Th (d), Ddc (e), and Dbh (f) expression in wild type peritoneal macrophages stimulated with vehicle (Veh) or IL4 (10 ngml<sup>-1</sup>) for 24 hours (n=5 per condition). **g**, Representative FACS plots of tyrosine hydroxylase expression in WT and STAT6<sup>-/-</sup> peritoneal macrophages treated with IL4 (10 ngml<sup>-1</sup>). \*P<0.05, \*\*P < 0.01 compared to Veh.

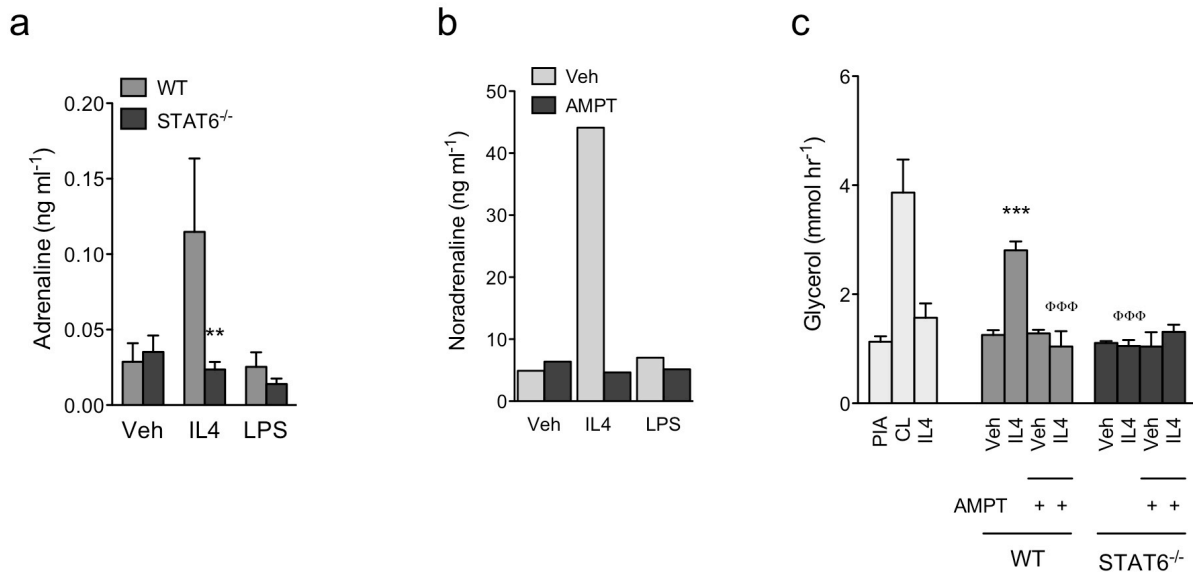

**Supplementary Figure 7. Macrophage conditioned medium regulates lipolysis.** **a**, Adrenaline secretion by WT and STAT6<sup>-/-</sup> bone marrow-derived macrophages (BMDMs) stimulated with IL4 or LPS (n=5 per genotype and condition). **b**, Noradrenaline production by IL4-treated BMDMs in the presence or absence of  $\alpha$ -methyl-p-tyrosine (AMPT 2 mM, Sigma). **c**, Glycerol release by 3T3-L1 adipocytes after treatment with PIA, CL, IL4 or macrophage conditioned medium ( $\pm$  IL4 and AMPT) for 6 hours, n=4-6 per genotype and condition. \*\*\*P < 0.001 compared to WT with Veh.  $\Phi\Phi\Phi$  P < 0.001 compared to WT with IL4.

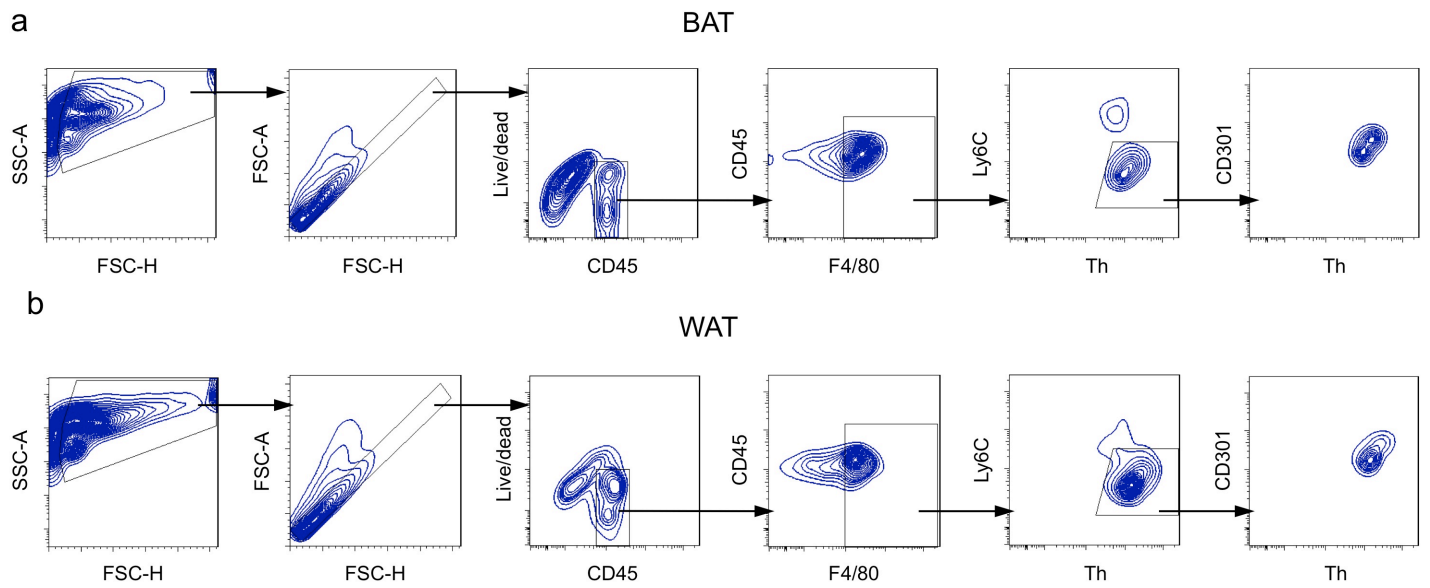

**Supplementary Figure 8. Flow cytometric gating strategy for tyrosine hydroxylase expression in adipose tissue macrophages. a, b,** Stromal vascular fractions were isolated from BAT (a) and WAT (b), and gated for side- and forward-scatter (SSC/FSC), doublets, and live cells prior to the analysis of the CD45<sup>+</sup>F4/80<sup>+</sup> macrophages. Tyrosine hydroxylase (Th) co-localizes with CD301 in BAT and WAT macrophages.

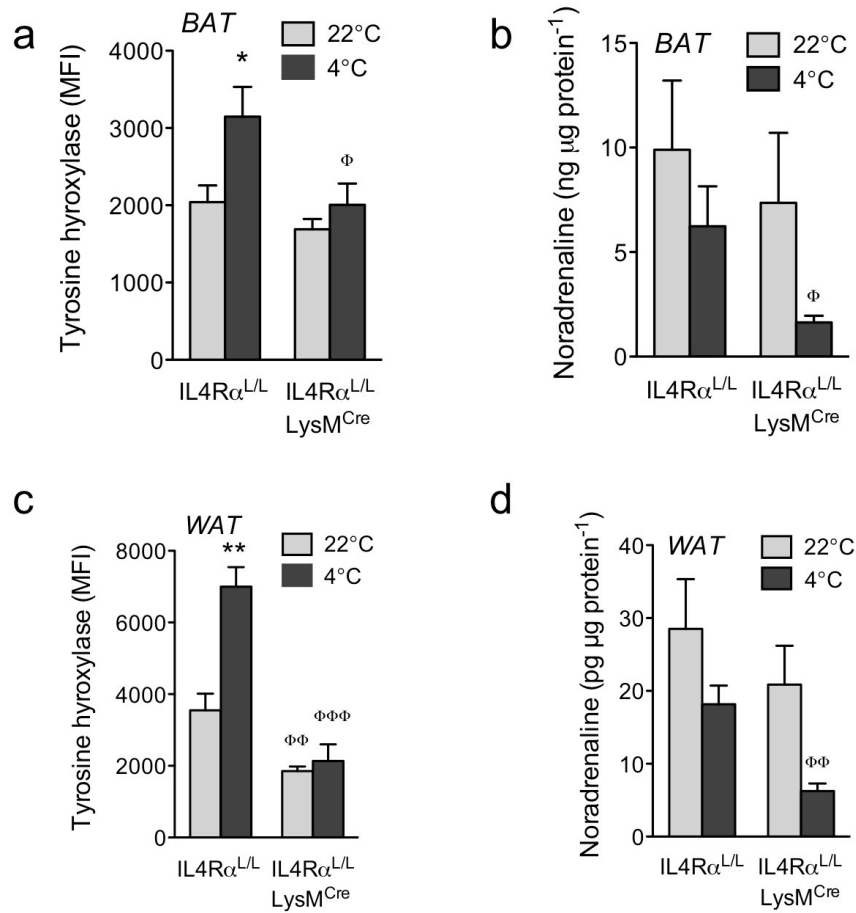

**Supplementary Figure 9. Tyrosine hydroxylase expression and catecholamine production by alternatively activated adipose tissue macrophages.** **a, c**, Tyrosine hydroxylase expression in BAT (a) and WAT (c) macrophages of IL4R $\alpha^{L/L}$  and IL4R $\alpha^{L/L}$ LysM<sup>Cre</sup> mice housed at 22 °C or 4 °C (n=4-5 per genotype and temperature). **b, d**, Noradrenaline content of BAT (b) and WAT (d) of IL4R $\alpha^{L/L}$  and IL4R $\alpha^{L/L}$ LysM<sup>Cre</sup> mice at various temperatures (n=4-5 per genotype and temperature). \*\*P < 0.01 comparison of values at 22°C and 4 °C in IL4R $\alpha^{L/L}$  mice.  $\Phi$ P < 0.05,  $\Phi\Phi$  < 0.01,  $\Phi\Phi\Phi$  < 0.001 comparison between IL4R $\alpha^{L/L}$  and IL4R $\alpha^{L/L}$ LysM<sup>Cre</sup> mice at the same temperature.

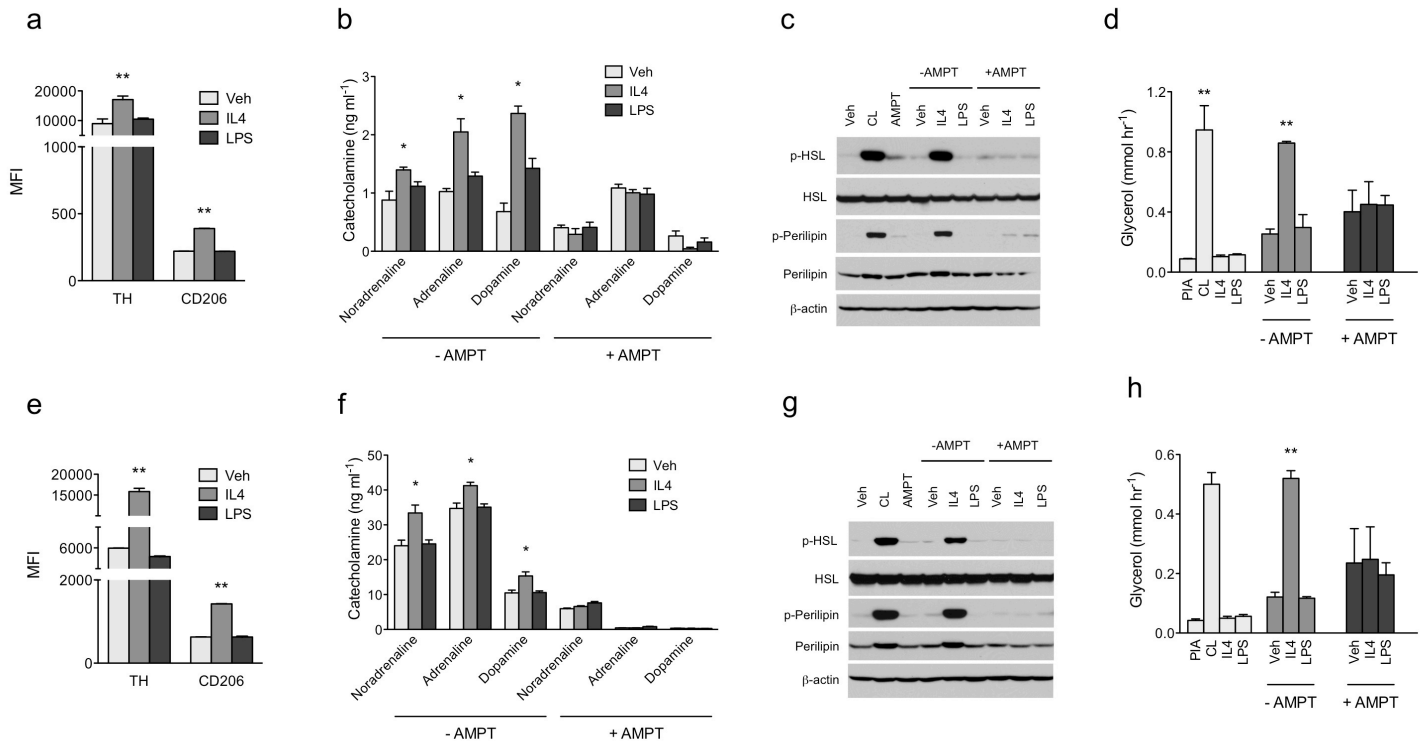

**Supplementary Figure 10. Human monocytes and macrophages produce catecholamines.** **a, e**, Expression of tyrosine hydroxylase and CD206 in primary monocytes (**a**) and human macrophage cell line U937 (**e**) treated with vehicle (Veh), IL4 (10 ngml<sup>-1</sup>), or lipopolysaccharide (LPS, 10 ngml<sup>-1</sup>), n=4-5 per condition. **b, f**, Catecholamine secretion by primary monocytes (**b**) and human macrophage cell line U937 (**f**) stimulated with IL4 or LPS, ( $\pm$  AMPT), n=4 per condition. **c, g**, Immunoblot analysis for phosphorylated-HSL and total HSL, phosphorylated-perilipin and total perilipin in 3T3-L1 adipocytes treated with PIA (1 mM), CL-316243 (1 mM), IL4 (10 ngml<sup>-1</sup>), primary monocyte (**c**) or U937 cell (**g**) conditioned medium ( $\pm$  IL4 and AMPT) for 15 min. PIA (N6-phenylisopropyl adenosine), AMPT (a-methyl-p-tyrosine). **d, h**, Glycerol release by 3T3-L1 adipocytes after 6h treatment with PIA, CL, IL4, primary monocyte (**d**) or U937 cell (**h**) conditioned medium (n=5 per condition). \*P < 0.05, \*\*P < 0.01 compared to Veh.

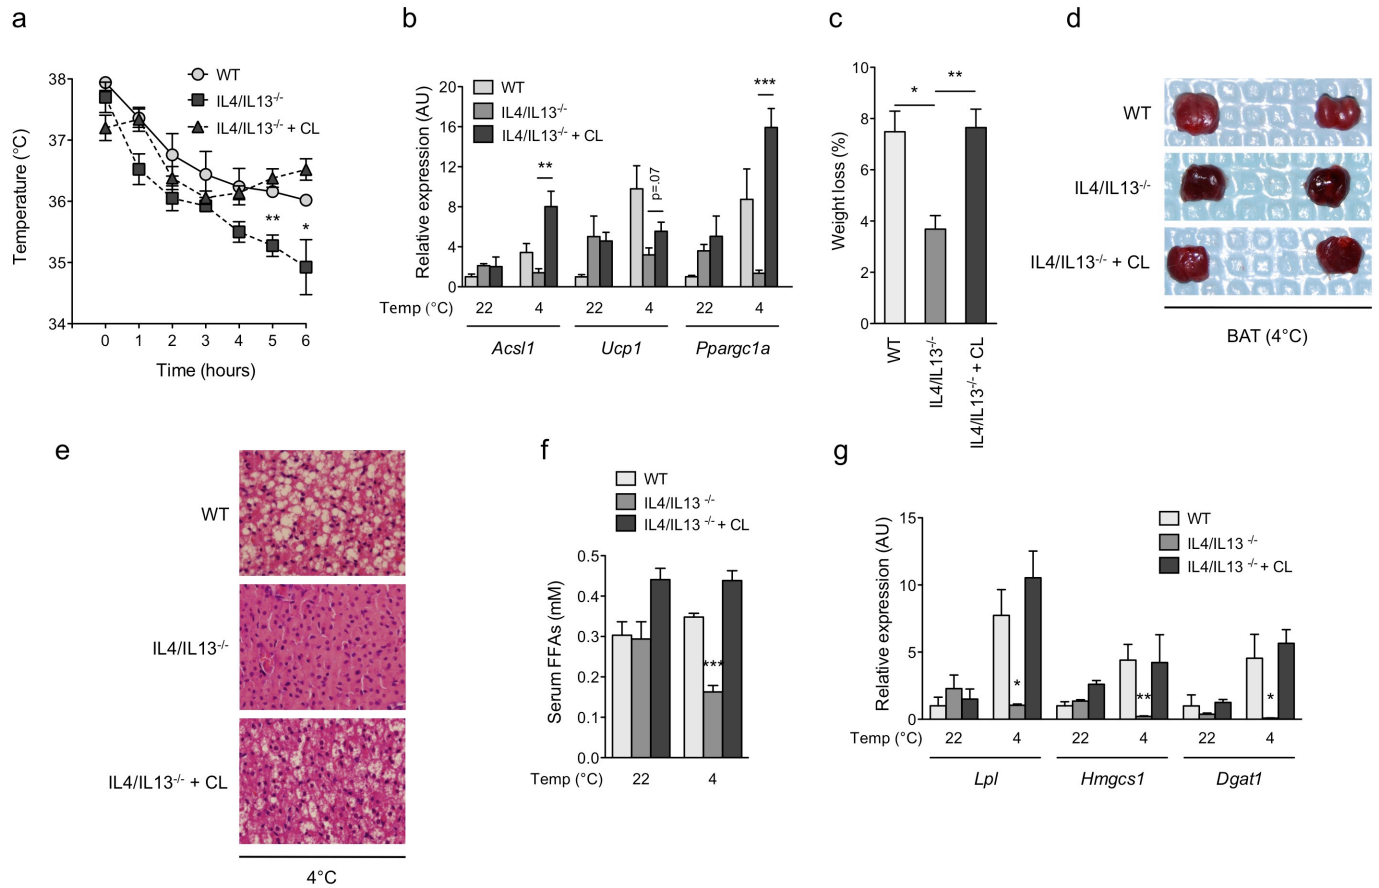

**Supplementary Figure 11. Characteristics of IL4/IL13<sup>-/-</sup> mice treated with  $\beta$ 3-adrenergic agonist CL-316243.** **a**, Core body temperature of WT, IL4/IL13<sup>-/-</sup> and IL4/IL13<sup>-/-</sup> mice treated with CL-316243 (n=5 per genotype and treatment). **b**, Real-time PCR analysis of thermogenic genes in BAT of WT, IL4/IL13<sup>-/-</sup> and IL4/IL13<sup>-/-</sup> mice treated with CL-316243 (n=4-5 per genotype and treatment). **c**, Cold (4 °C) induced weight loss in WT, IL4/IL13<sup>-/-</sup> and IL4/IL13<sup>-/-</sup> mice treated with CL-316243 (n=4-5 per genotype and treatment). **d-e**, Representative histology of BAT from WT, IL4/IL13<sup>-/-</sup> and IL4/IL13<sup>-/-</sup> mice treated with CL-316243 after exposure to 4 °C; gross (d) and haematoxylin and eosin stained sections (e). **f**, Serum free fatty acid (FFA) levels in WT, IL4/IL13<sup>-/-</sup>, and IL4/IL13<sup>-/-</sup> mice treated with CL-316243 housed at 22 °C or 4 °C (n=4-5 per condition and genotype). **g**, Real-time PCR of lipogenic genes (*Lpl*, *Dgat1*, *Hmgcs1*) in BAT of WT, IL4/IL13<sup>-/-</sup>, and IL4/IL13<sup>-/-</sup> mice treated with CL-316243 housed at 22 °C or 4 °C (n=4-5 per genotype and temperature). \*P < 0.05, \*\*P < 0.01, \*\*\* P < 0.001 compared to WT.

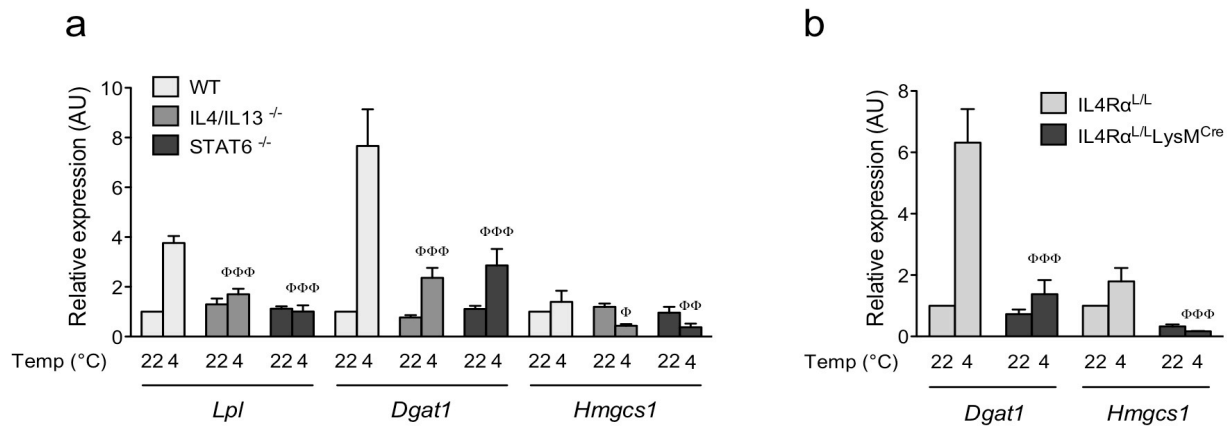

**Supplementary Figure 12. Cold challenge induces lipogenic gene expression in brown adipose tissue.** **a**, Real-time PCR of lipogenic genes (*Lpl*, *Dgat1*, *Hmgcs1*) in BAT of WT, IL4/IL13<sup>-/-</sup>, and STAT6<sup>-/-</sup> mice housed at 22 °C or 4 °C (n=4-5 per genotype and temperature). **b**, Real-time PCR of lipogenic genes (*Dgat1*, *Hmgcs1*) in BAT of IL4R $\alpha$ <sup>L/L</sup> and IL4R $\alpha$ <sup>L/L</sup>LysM<sup>Cre</sup> mice housed at 22 °C or 4 °C (n=4-5 per genotype and temperature).  $\Phi$ P < 0.05,  $\Phi\Phi$ P < 0.01,  $\Phi\Phi\Phi$ P < 0.001 compared to WT or IL4R $\alpha$ <sup>L/L</sup> at 4 °C.

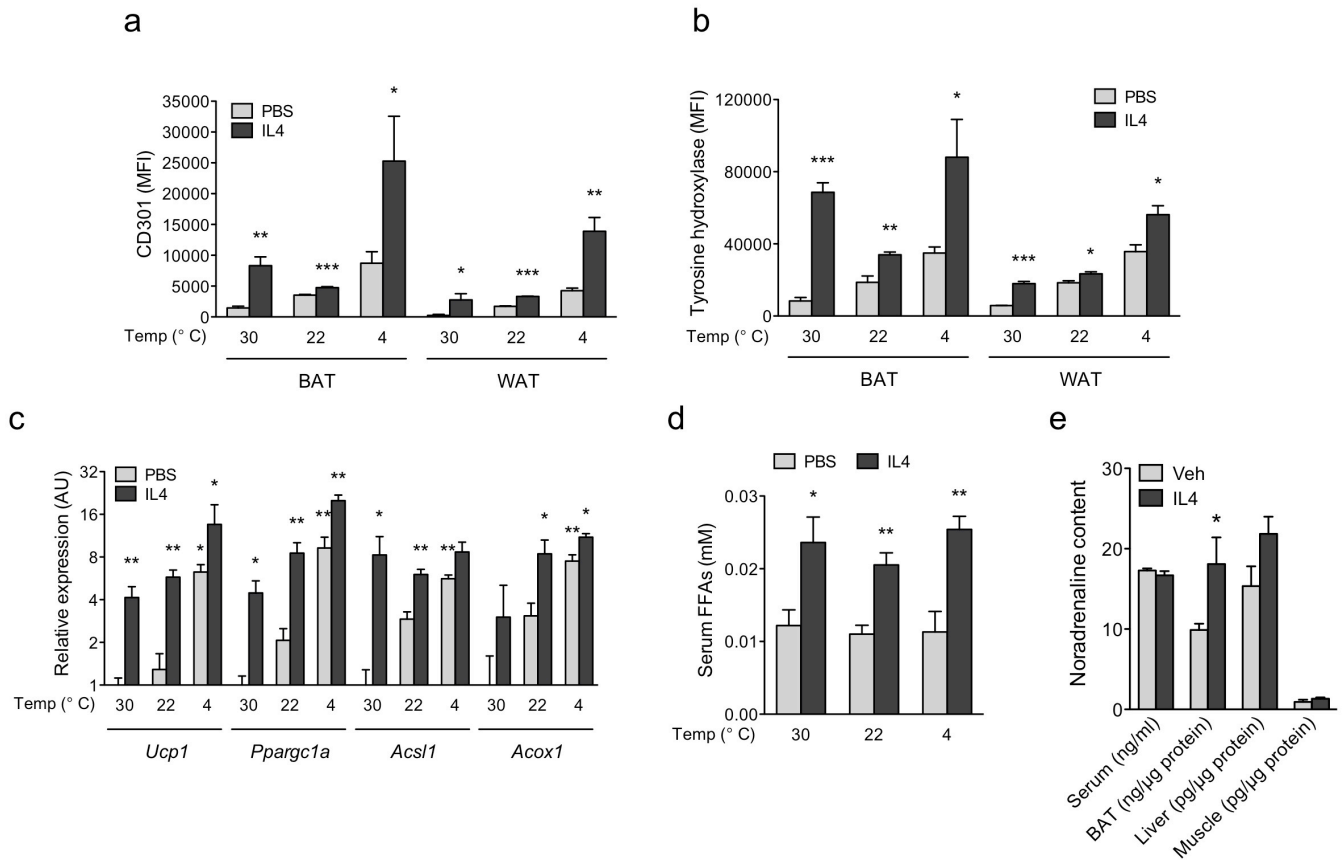

**Supplementary Figure 13. Effects of IL4 in wild type mice housed at various temperatures.** **a, b**, Expression of alternative activation marker CD301 (a) and tyrosine hydroxylase (b) in adipose tissue macrophages of WT mice injected with vehicle (Veh) or IL4 at 30 °C, 22 °C or 4°C (n=4-5 per condition). **c**, Real-time RT-PCR analysis of thermogenic genes (*Acox1*, *Acs1*, *Ppargc1a*, and *Ucp1*) in BAT of WT mice treated with Veh or IL4 for 6h at various temperatures (n=4-5 per condition). **d**, Serum free fatty acid (FFA) levels of WT mice treated with Veh or IL4 for 6h at 30°C, 22°C, and 4°C (n=4-5 per condition). **e**, Noradrenaline content of serum and various tissues 30 minutes after injection of IL4. \*P < 0.05, \*\*P < 0.01, \*\*\* P < 0.001 compared to Veh.



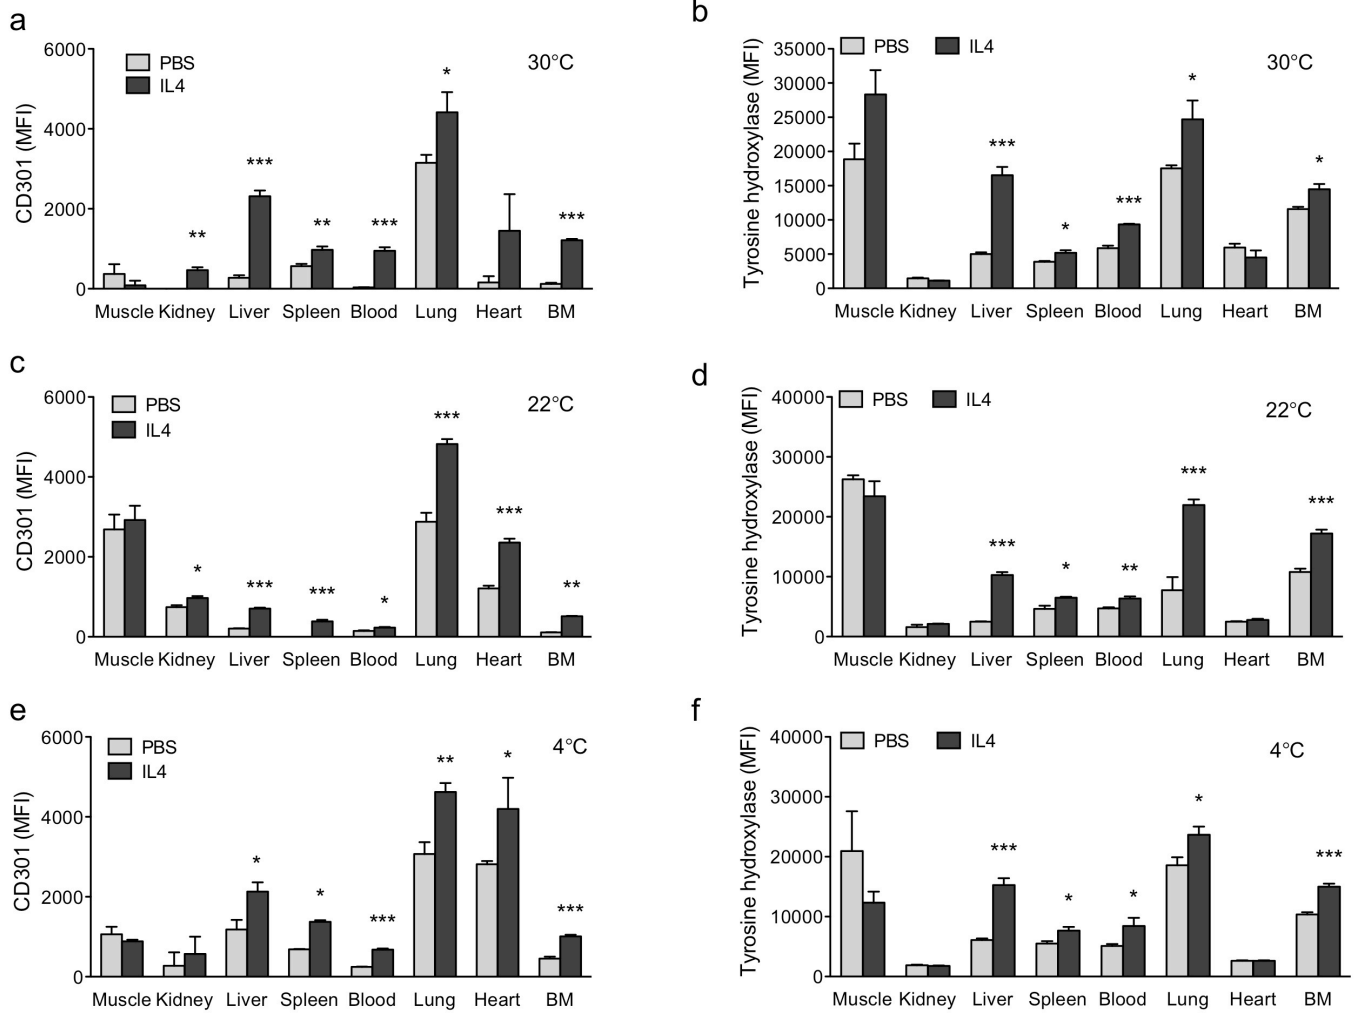

**Supplementary Figure 14. Expression of CD301 and tyrosine hydroxylase in wild type mouse tissues at various temperatures.** **a, c, e,** Expression of CD301 was quantified by flow cytometry in wild type mice 6 hours after administration of vehicle (Veh) or IL4 at 30°C (**a**), 22°C (**c**), and 4°C (**e**) (n=4-5 per condition). **b, d, f,** Tyrosine hydroxylase expression was quantified in mouse tissue macrophages by flow cytometry 6 hours after injection of vehicle (Veh) or IL4 at 30°C (**d**), 22°C (**e**), and 4°C (**f**) (n=4-5 per condition). Bone marrow (BM). \*P < 0.05, \*\*P < 0.01, \*\*\* P < 0.001 compared to Veh.

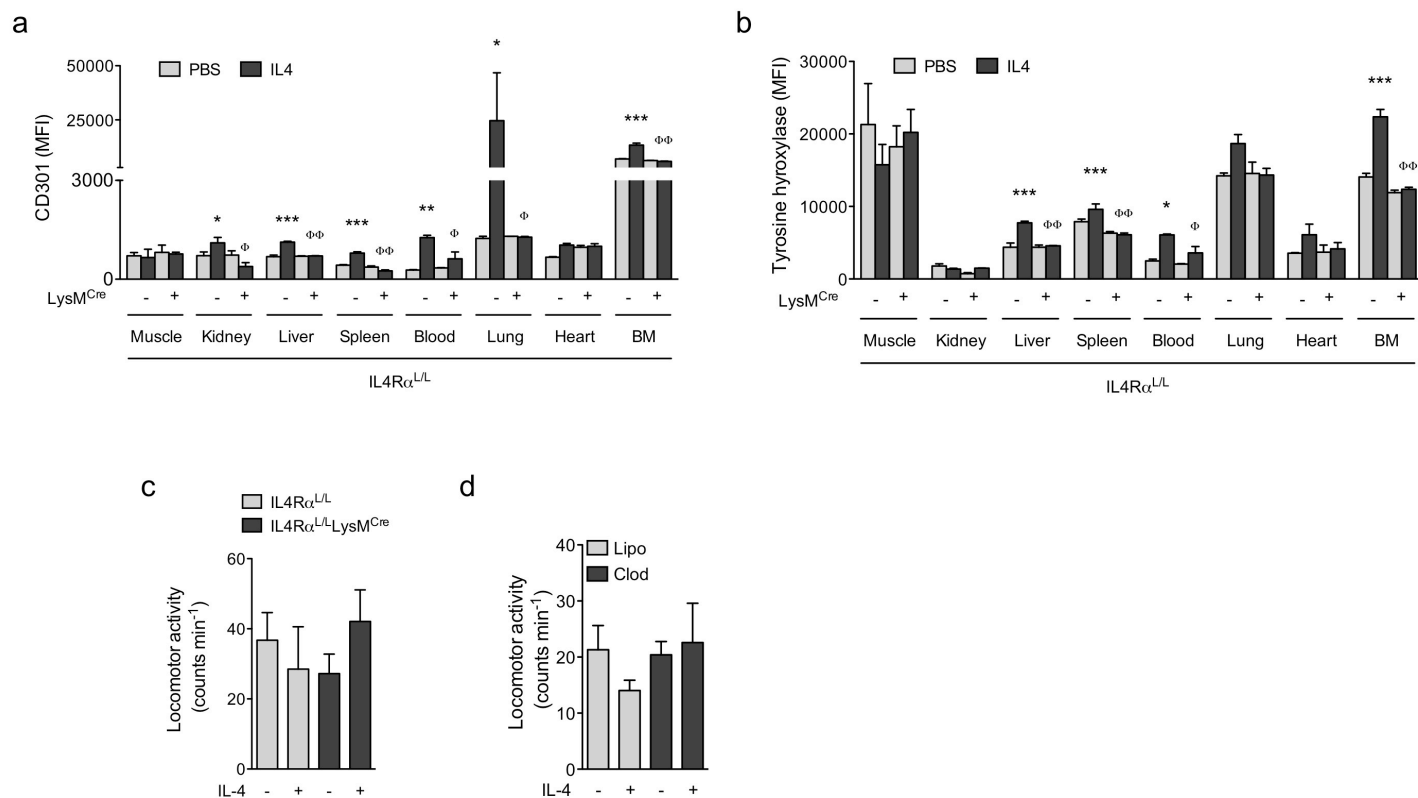

**Supplementary Figure 15. Effects of IL4 in IL4R $\alpha^{L/L}$  and IL4R $\alpha^{L/L}$ LysM $^{Cre}$  mice.** **a, b**, Expression of CD301 (a) and tyrosine hydroxylase (b) in tissue macrophages of IL4R $\alpha^{L/L}$  and IL4R $\alpha^{L/L}$ LysM $^{Cre}$  mice treated with vehicle (Veh) or IL4 at 22°C (n=4-5 per genotype and condition). **c, d**, Locomotor activity of IL4R $\alpha^{L/L}$  and IL4R $\alpha^{L/L}$ LysM $^{Cre}$  mice (c), and liposome (Lipo) or clodronate-containing liposome (Clod) treated mice (d) after IL4 injection (n=7-8 per genotype and condition). \*P < 0.05, \*\*P < 0.01, \*\*\*P < 0.001 compared to IL4R $\alpha^{L/L}$  with Veh.  $\Phi$ P < 0.05,  $\Phi\Phi$ P < 0.01,  $\Phi\Phi\Phi$ P < 0.001 compared to IL4R $\alpha^{L/L}$  with IL4.
