# Supplementary material
Source: PubMed Central journal article supplement (PMC3371761)
Supplement: NIHMS332755-supplement-5.pdf [file NIHMS332755-supplement-5.pdf]

# Editorial checklist for *Nature* Biology Letters

Manuscript number: 2011-03-02879B

Author name: Ajay Chawla

Title: Alternatively activated macrophages produce catecholamines to sustain adaptive thermogenesis

**These points are additional to those in the downloadable checklist for production, at [http://mts-nature.nature.com/letters/ms\\_checklist.pdf](http://mts-nature.nature.com/letters/ms_checklist.pdf). Please note that we cannot accept your paper unless you have completed and returned BOTH checklists and confirmed that your manuscript meets all of the relevant criteria.**

## 1. Formatting

|                                                                                                                                                                                                                                                  | Yes                         |
|--------------------------------------------------------------------------------------------------------------------------------------------------------------------------------------------------------------------------------------------------|-----------------------------|
| The paper is within the 4 page length limit for letters. (Please use the macro to help you determine the length of your paper.)                                                                                                                  | N- 5 pages per instructions |
| The methods summary is less than 300 words and the full methods are provided in the SAME word document as the main text, after the figure legends. (The numbering of references in the full methods section continues from the main references.) | Y                           |
| All error bars are defined in the figure legends.                                                                                                                                                                                                | Y                           |
| The <i>n</i> is noted in all figure legends, where appropriate.                                                                                                                                                                                  | Y                           |
| Figures do not contain tables as sub-panels. Tables should be provided as separate display items.                                                                                                                                                | Y                           |
| Where possible the SI is submitted as a combined, single PDF.                                                                                                                                                                                    | Y                           |
| No more than 10 SI files (including sound/movie files) are submitted. Each individual file (including combined, single PDFs) is not larger than 30MB and the cumulative size of the files is not larger than 150MB.                              | Y                           |
| The figure legends in the SI are displayed under the individual figures.                                                                                                                                                                         | Y                           |

## 2. Special considerations

Please confirm that your manuscript meets each of the relevant criteria below, by ticking either “yes” or “not applicable”.

|                                                                                                                                                         | Yes | N/A |
|---------------------------------------------------------------------------------------------------------------------------------------------------------|-----|-----|
| RNAi: all small RNA sequences are provided.                                                                                                             |     | X   |
| Microarrays: data are in MIAME format.                                                                                                                  |     | X   |
| Small molecules: full characterization (including structure) is provided.                                                                               |     | X   |
| Protein structures: <i>Nature</i> standard table has been used for X-ray crystallography/NMR data.                                                      |     | X   |
| Accession numbers are provided for microarray/protein sequence/gene sequences.                                                                          |     | X   |
| Human studies: informed consent and approval statement provided.                                                                                        |     | X   |
| Animal studies: approval statement provided.                                                                                                            |     | X   |
| Animal studies: details of sex, husbandry, housing and other characteristics are provided, where they are likely to influence the experimental results. | X   |     |
| Harvard and MIT authors: signed waiver letter accepting our licence to publish terms and conditions is provided.                                        |     | X   |
